# Supplementary material for: Comparative Proteomic Analysis of Mycobacterium tuberculosis Lineage 7 and Lineage 4 Strains Reveals Differentially Abundant Proteins Linked to Slow Growth and Virulence
Source: PubMed Central journal article supplement (PMC5423352; doi:10.3389/fmicb.2017.00795), 2017-05-09

**A***Mycobacterium tuberculosis* Lineages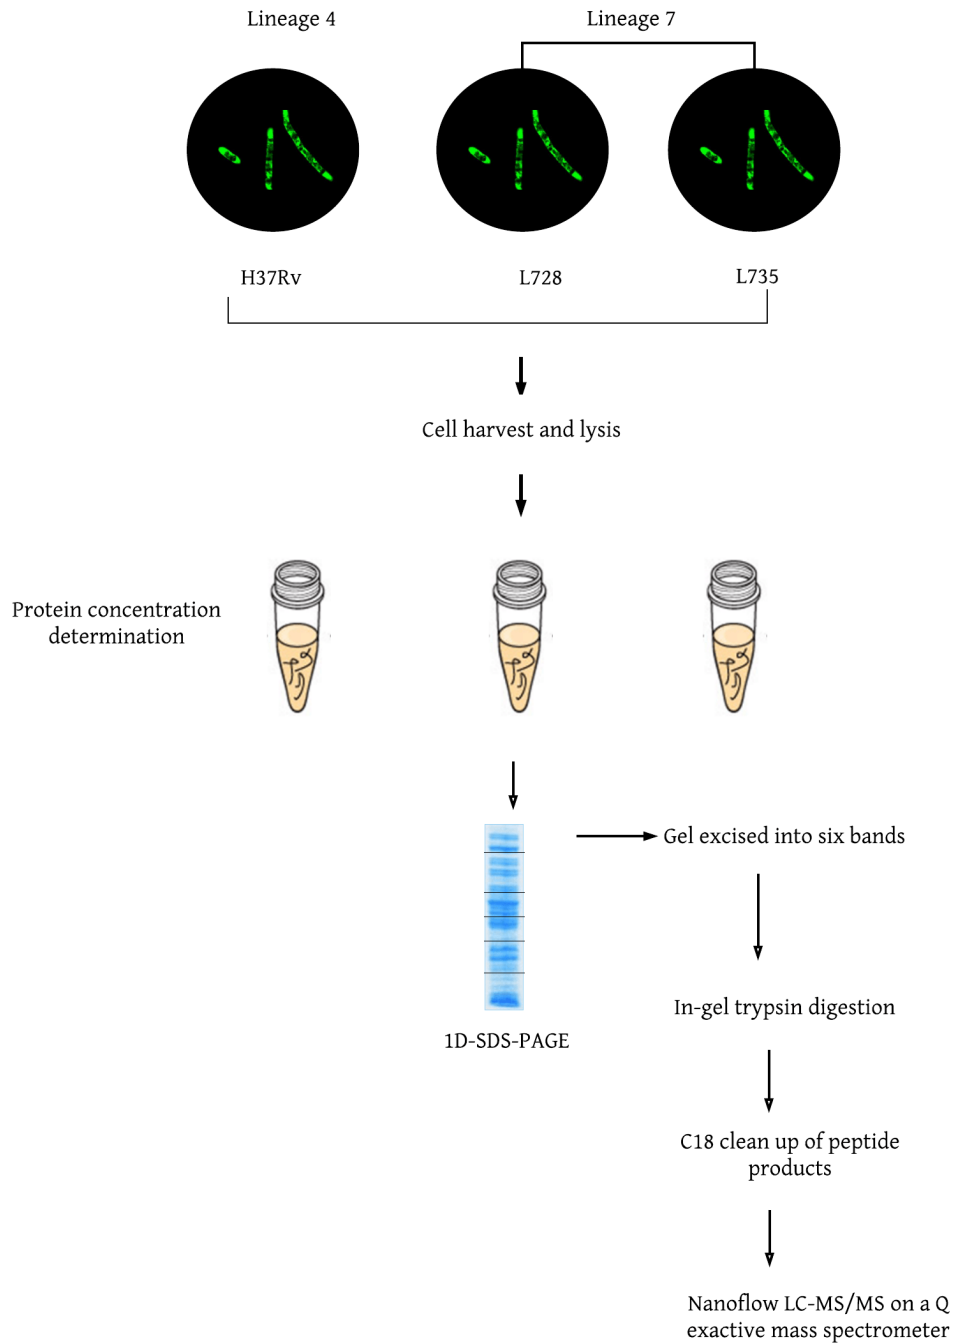**B**

Three biological protein samples from Lineage 4 and two clinical isolates of Lineage 7

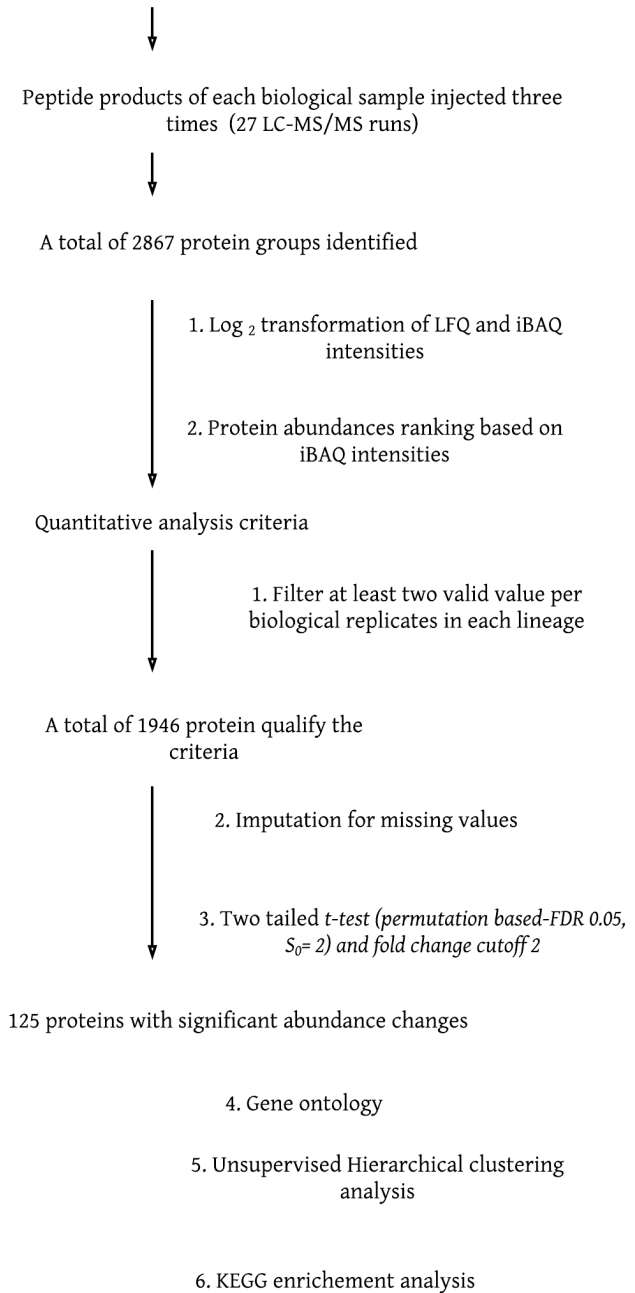

Supplement: DataSheet1.pdf [file DataSheet1.pdf]
